# Supplementary material for: Cultivation and Characterization of Cornea Limbal Epithelial Stem Cells on Lens Capsule in Animal Material-Free Medium
Source: PubMed Central journal article supplement (PMC3467238; doi:10.1371/journal.pone.0047187), 2012-10-09
Supplement: pone.0047187.s004.pdf [file pone.0047187.s004.pdf]

**Supplementary Table 2**

| <b>Antibody</b>     | <b>Clone</b> | <b>Cat.No.</b> | <b>Company</b>   |
|---------------------|--------------|----------------|------------------|
| ABCG2               | BXP-21       | b7059          | Sigma            |
| CD14                | 134620       | FAB3832P       | R&D              |
| CD31/PECAM          | 9G11         | FAB3567P       | R&D              |
| CD34                | 581          | 555821         | BD               |
| CD45                | HI30         | 555485         | BD               |
| CD47                | 472603       | FAB4670A       | R&D              |
| CD49a               | TS2/7        | 328304         | Biologend        |
| CD49b               | HAS3         | FAB1233P       | R&D              |
| CD49f               | GoH3         | 555735         | BD               |
| CD56/NCAM           | 301040       | FAB2408A       | R&D              |
| CD90/Thy-1          |              | 555595         | BD               |
| CD104               |              | 555720         | BD               |
| CD105/Endoglin      | 166707       | FAB10971F      | R&D              |
| CD117/c-kit         | 47233        | FAB332P        | R&D              |
| CD133               |              |                | Miltenyi Biotech |
| CD144/ VE-Cadherine | 55-7H1       | 560410         | BD               |
| CD146/MCAM          | 128018       | FAB932A        | R&D              |
| CD147/Neurothelin   | HIM6         | 555962         | BD               |
| CD166/ALCAM         | 105902       | FAB6561P       | R&D              |
| CXCR4               | 44717        | FAB173A        | R&D              |
| Cytokeratin 8/18    | 5D3          | ab 17139       | Abcam            |
| Cytokeratin-19      |              | rb-9021-P      | NeoMarkers       |
| HLA-DR              | L203         | FAB4869F       | R&D              |
| Ki-67               |              | RM-9106-S      | NeoMarkers       |
| p63                 | Ab-4         | Ms-1084-P      | NeoMarkers       |
| PDGF R $\beta$      | PR7212       | FAB1263P       | R&D              |
| VEGFR2/KDR          | 89106        | FAB357P        | R&D              |
| Vimentin            | SP20         | RM-9120-S      | NeoMarkers       |
