# Supplementary material for: Cultivation and Characterization of Cornea Limbal Epithelial Stem Cells on Lens Capsule in Animal Material-Free Medium
Source: PLoS One. 2012 Oct 9;7(10):e47187. doi: 10.1371/journal.pone.0047187 (PMC3467238; doi:10.1371/journal.pone.0047187)
Supplement: Table S1 — Additional transcripts and functional clustering of selected genes in LESCs compared to differentiated corneal epithelium with high or low FC or previously documented relation to LESCs (n = 3, p<0.01). (PDF) [file pone.0047187.s003.pdf]

**Supplementary Table 1. Additional transcripts and functional clustering of selected genes in LSCs compared to differentiated corneal epithelium with high or low FC or previously documented relation to LSCs**

| Gene symbol | Gene description                                                                                       | Fold change | Regulation | Molecular function                                     |
|-------------|--------------------------------------------------------------------------------------------------------|-------------|------------|--------------------------------------------------------|
| UCA1        | Urothelial cancer associated 1                                                                         | 21          | Up         | Long non-coding RNA coding sequence                    |
| C12orf36    | Chromosome 12 open reading frame 36                                                                    | 29          | Up         | ---                                                    |
| TFPI2       | Tissue factor pathway inhibitor 2                                                                      | 24          | Up         | Serine-type endopeptidase inhibitor activity           |
| HAS2        | Hyaluronan synthase 2                                                                                  | 22          | Up         | Hyaluronan synthase activity                           |
| NETO2       | Neuropilin (NRP) and tolloid (TLL)-like 2                                                              | 21          | Up         | Receptor activity                                      |
| TCN1        | Transcobalamin I (vitamin B12 binding protein, R binder family)                                        | 45          | Up         | Cobalamin binding                                      |
| SYTL5       | Synaptotagmin-like 5                                                                                   | 26          | Up         | Protein binding                                        |
| TINAGL1     | Tubulointerstitial nephritis antigen-like 1                                                            | 22          | Up         | Cysteine-type endopeptidase activity                   |
| CCNA1       | Cyclin A1                                                                                              | 27          | Up         | Protein binding                                        |
| SPON1       | Spondin 1, extracellular matrix protein                                                                | 21          | Up         | Protein binding                                        |
| INHBA       | Inhibin, beta A                                                                                        | 22          | Up         | Signal transducer activity                             |
| HSPB8       | Heat shock 22kda protein 8                                                                             | 33          | Up         | Protein serine/threonine kinase activity               |
| C9orf150    | Chromosome 9 open reading frame 150                                                                    | 28          | Up         | ---                                                    |
| VTCN1       | V-set domain containing T cell activation inhibitor 1                                                  | 33          | Up         | ---                                                    |
| GABRP       | γ-aminobutyric acid (GABA) A receptor, pi                                                              | 20          | Up         | GABA-A receptor activity                               |
| FMO1        | Flavin containing monooxygenase 1                                                                      | 54          | Up         | Monooxygenase activity                                 |
| C15orf48    | Chromosome 15 open reading frame 48                                                                    | 29          | Up         | ---                                                    |
| IVL         | Involucrin                                                                                             | 20          | Up         | Structural molecule activity                           |
| ANXA3       | Annexin A3                                                                                             | 35          | Up         | Calcium ion binding                                    |
| CLC         | Charcot-Leyden crystal protein                                                                         | 20          | Down       | Lysophospholipase activity                             |
| CNTN4       | Contactin 4                                                                                            | 20          | Down       | Protein binding                                        |
| DGKB        | Diacylglycerol kinase, beta 90kda                                                                      | 43          | Down       | Nucleotide binding                                     |
| FAM169A     | Family with sequence similarity 169, member A                                                          | 20          | Down       | ---                                                    |
| PRUNE2      | Prune homolog 2 (Drosophila)                                                                           | 33          | Down       | Oxidoreductase activity                                |
| CPVL        | Carboxypeptidase, vitellogenic-like                                                                    | 28          | Down       | Serine-type carboxypeptidase activity                  |
| SLC16A6     | Solute carrier family 16, member 6 (monocarboxylic acid transporter 7)                                 | 23          | Down       | Monocarboxylic acid transmembrane transporter activity |
| SLC16A12    | Solute carrier family 16, member 12 (monocarboxylic acid transporter 12)                               | 22          | Down       | Symporter activity                                     |
| SIAH3       | Seven in absentia homolog 3 (Drosophila)                                                               | 24          | Down       | Metal ion binding                                      |
| ST6GALNAC3  | ST6 (α-N-acetyl-neuraminyl-2,3-β-galactosyl-1,3)-N-acetylgalactosaminide alpha-2,6-sialyltransferase 3 | 25          | Down       | Sialyltransferase activity                             |
| TMEM100     | Transmembrane protein 100                                                                              | 21          | Down       | ---                                                    |
| SCIN        | Scinderin                                                                                              | 25          | Down       | Phosphatidylserine binding                             |
| HLF         | Hepatic leukemia factor                                                                                | 45          | Down       | DNA binding                                            |
| GRIN2A      | Glutamate receptor, ionotropic, N-methyl D-aspartate 2                                                 | 20          | Down       | Receptor activity                                      |
| SNORA60     | Small nucleolar RNA, H/ACA box 60                                                                      | 19          | Down       | ---                                                    |
| TRIM36      | Tripartite motif-containing 36                                                                         | 18          | Down       | Protein binding                                        |
| ANO4        | Anoctamin 4                                                                                            | 33          | Down       | Ion channel activity                                   |
| CD36        | CD36 molecule (thrombospondin receptor)                                                                | 44          | Down       | Low-density lipoprotein receptor activity              |
